# Supplementary material for: TALEN-based generation of a cynomolgus monkey disease model for human microcephaly
Source: PubMed Central journal article supplement — Cell Res. 2016 Aug 9;26(9):1048–61. doi: 10.1038/cr.2016.93 (PMC5034111; doi:10.1038/cr.2016.93), 2016-08-09
Supplement: cr201693x1.pdf [file cr201693x1.pdf]

**A**

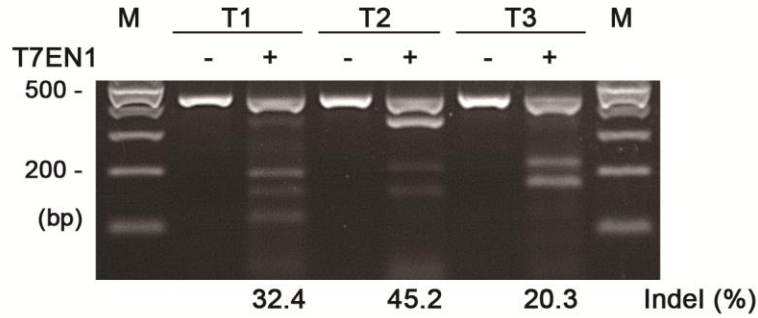

**B**

| mRNA (ng/μl) | MII oocytes | 2-cell embryos | Morula/blastocyst (% of 2-cell) | Embryos sequenced | Monoallelic mutation | Biallelic mutation | Wild type |
|--------------|-------------|----------------|---------------------------------|-------------------|----------------------|--------------------|-----------|
| 20:20        | 10          | 8              | 5 (62.5%)                       | 8                 | 3 (37.5%)            | 1 (12.5%)          | 4 (50.0%) |
| 50:50        | 13          | 8              | 4 (50.0%)                       | 7                 | 6 (85.7%)            | 0 (0%)             | 1 (14.3%) |

**C**

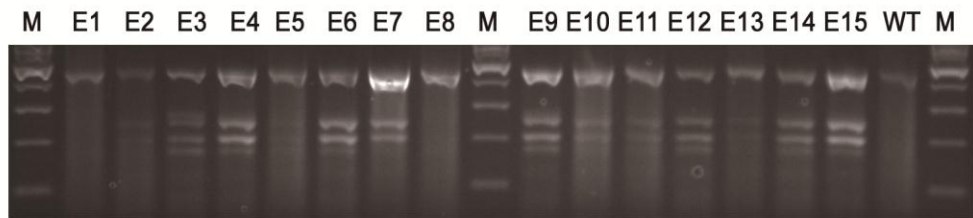

**D**

WT: TTATCTTCAAAGATGGCTACCAGAGCACTTGGGACAAAGCTCGAAA

E1: TTATCTTCAAAGATGGCTACCAGAGCACTTGGGACAAAGCTCGAAA WT (6/6)

E2: TTATCTTCAAAGATGGCTACCAGAGCACTTGGGACAAAGCTCGAAA WT (8/8)

E3: =====TACCAGAGCACTTGG=====GCTCGAAA Δ51 (4/8)  
TTATCTTCAAAGATGGCTACCA===== Δ164 (4/8)

E4: TTATCTTCAAAGATGGCTACCAGAGCACTTGGGACAAAGCTCGAAA WT (4/10)  
=====TACCAGAGCACTTGG=CAAAGCTCGAAA Δ49 (6/10)

E5: TTATCTTCAAAGATGGCTACCAGAGCACTTGGGACAAAGCTCGAAA WT (8/8)

E6: TTATCTTCAAAGATGGCTACCAGAGCACTTGGGACAAAGCTCGAAA WT (5/8)  
TTATCTTCAAAGATGGCTA=gccatct=TTGGGACAAAGCTCGAAA Δ9bp +7bp (3/8)

E7: TTATCTTCAAAGATGGCTACCAGAGCACTTGGGACAAAGCTCGAAA WT (6/8)  
TTATCTTCAAAGATGGCTACCAGAGCA==TGGGACAAAGCTCGAAA Δ2 (1/8)  
TTATCTTCAAAGATGGCT=====TGGGACAAAGCTCGAAA Δ11 (1/8)

E8: TTATCTTCAAAGATGGCTACCAGAGCACTTGGGACAAAGCTCGAAA WT (6/6)

E9: TTATCTTCAAAGATGGCTACCAGAGCACTTGGGACAAAGCTCGAAA WT (4/8)  
TTATCTTCAAAGATGGCTACCAGA==ACTTGGGACAAAGCTCGAAA Δ2 (4/8)

E10: TTATCTTCAAAGATGGCTACCAGAGCACTTGGGACAAAGCTCGAAA WT (6/8)  
TTATCTTCAAAGATGGCTACCA=====ACTTGGGACAAAGCTCGAAA Δ4 (2/8)

E11: TTATCTTCAAAGATGGCTACCAGAGCACTTGGGACAAAGCTCGAAA WT (8/10)  
TTATCTTCAAAGATGGCTACCAaAGCACTTGGGACAAAGCTCGAAA Δ1bp +1bp (2/10)

E12: TTATCTTCAAAGATGGCTACCAGAGCACTTGGGACAAAGCTCGAAA WT (5/9)  
TTATCTTCAAAGATGGCTACCAG===== large fragment (4/9)

E13: TTATCTTCAAAGATGGCTACCAGAGCACTTGGGACAAAGCTCGAAA WT (8/8)

E14: TTATCTTCAAAGATGGCTACCAGAGCACTTGGGACAAAGCTCGAAA WT (11/15)  
TTATCTTCAAAGATGGCTACCAGAGCACcTGGGACAAAGCTCGAAA Δ1bp +1bp (4/15)

E15: TTATCTTCAAAGATGGCTACCAGAGCACTTGGGACAAAGCTCGAAA WT (7/12)  
TTATCTTCAAAGATGGCTACCA=====CT=GGGACAAAGCTCGAAA Δ6bp (5/12)

**Figure S1. Evaluation of TALEN-mediated mutagenesis in COS-7 cells and cynomolgus**

## monkey embryos

(A) T7EN1 assay of the indel rate (shown below the relevant lanes) of three TALENs targeting the cynomolgus monkey *MCPHI* gene. The TALEN-targeting sequences are labeled as T1, T2 and T3; M, Marker.

(B) Effects of TALEN mRNA injection at different concentrations on the mutagenesis efficiency in cynomolgus monkey embryos.

(C) Genomic DNA extracted from 15 cynomolgus monkey embryos injected with *MCPHI-T2* mRNAs were subjected to PCR and T7EN1 assay. M, Marker; embryos E1-E8 received 20:20 ng  $\mu\text{l}^{-1}$ , while embryos E9-E15 received 50:50 ng  $\mu\text{l}^{-1}$ .

(D) Sanger sequencing of PCR products from 15 monkey embryos injected with *MCPHI-T2* mRNAs. Embryos E1-E8 received 20:20 ng  $\mu\text{l}^{-1}$  and embryos E9-E15 received 50:50 ng  $\mu\text{l}^{-1}$ . The targeting sequence is shown in red uppercase. The targeted integration and the sizes of each insertion (+, in lowercase) and deletion ( $\Delta$ ) are presented to the right of the corresponding allele. The fractions indicate the number of mutant sequencing reads (numerator) divided by number of total sequencing reads (denominator) of each allele.
