# Supplementary material for: TALEN-based generation of a cynomolgus monkey disease model for human microcephaly
Source: PubMed Central journal article supplement — Cell Res. 2016 Aug 9;26(9):1048–61. doi: 10.1038/cr.2016.93 (PMC5034111; doi:10.1038/cr.2016.93), 2016-08-09
Supplement: cr201693x3.pdf [file cr201693x3.pdf]

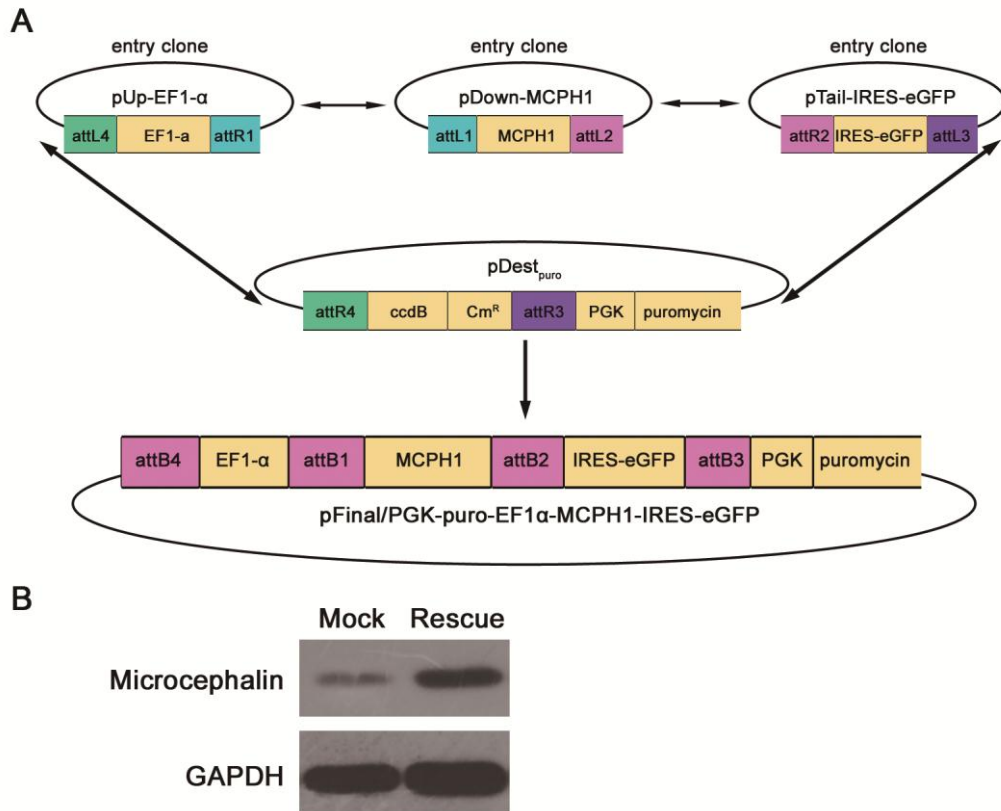

**Figure S3. Ectopic expression of MCPH1 in *MCPH1*<sup>mt/mt</sup> DFs**

(A) Vector construction. Schematic diagram of the pFinal/PGK-puro-EF1 $\alpha$ -MCPH1-IRES-eGFP vector (*MCPH1*-eGFP).

(B) Western blot analysis of MCPH1 expression in *MCPH1*<sup>mt/mt</sup> DFs transduced with empty vector or the *MCPH1*-overexpression vector. Labels: mock, eGFP expression vector; and rescue, *MCPH1*-eGFP expression vector.
