# Supplementary material for: TALEN-based generation of a cynomolgus monkey disease model for human microcephaly
Source: PubMed Central journal article supplement — Cell Res. 2016 Aug 9;26(9):1048–61. doi: 10.1038/cr.2016.93 (PMC5034111; doi:10.1038/cr.2016.93), 2016-08-09
Supplement: cr201693x6.pdf [file cr201693x6.pdf]

**Supplementary information Table 2. The primers used in this work**

Genomic DNA primers were designed to specifically amplify ~450 bp DNA fragments flanking each target site. Primers MCPH1-1F/R were used to amplify the MCPH1-T1 target site; primers MCPH1-2F/R were used to amplify the MCPH1-T2 and MCPH1-T3 target sites; and WT -test -F/R were used to amplify the wild-type allele.

|                        |                               |                                 |
|------------------------|-------------------------------|---------------------------------|
| Genomic DNA primers    | MCPH1-1F                      | AATCCCTGACTTCGTGGATCCACCTG      |
|                        | MCPH1-1R                      | ACTCAATGCCACAGGCCCAACTG         |
|                        | MCPH1-2F                      | AGCAGTGTTATGCATTCTTCGAGT        |
|                        | MCPH1-2R                      | TAGGTATTACAGTACGCCCATGTTT       |
| WT primers             | WT -test -F                   | TCTCAAAGATGGCTACCAGAGCAC        |
|                        | WT -test -R                   | TCTGTGATCTGTGCAAAATATCTCCA      |
| Off target DNA primers | intron mcph1-off 1F           | TACTCATGGTCACTTCCTGACCCTGTT     |
|                        | intron mcph1-off 1R           | TAACCTATGTGTAGCCTCTGTCATGAG     |
|                        | intron mcph1-off 2F           | AGCCTCTTGAATACTCTAGGCTTGTCTCCA  |
|                        | intron mcph1-off 2R           | AATTCCTTGCAGGTGAGACTAGGTATAT    |
|                        | intron mcph1-off 3F           | ACAATCCAAGTTCAAACCTCATCAAC      |
|                        | intron mcph1-off 3R           | AACTCAGGTCTGGTCTGACACTAGA       |
|                        | intron mcph1-off 4F           | TGTTTCATATTATGGAGAAGGAATTGAGTGG |
|                        | intron mcph1-off 4R           | ACAATCGCTTTACTGCTGGACTAGTAA     |
|                        | intron mcph1-off 5F           | ACGCATTTATACTTTTATATACCTGTG     |
|                        | intron mcph1-off 5R           | ATAGACACATCATGGTCAATTGATAAA     |
|                        | intron mcph1-off 6F           | TCACACTCTCCTGATCAAAAAGTGAAACATT |
|                        | intron mcph1-off 6R           | TCCAGCCACTTATTTACAAGAGTAGTA     |
|                        | intron mcph1-off 7F           | CCCTTGGAGAGGACCTTGACTTCAGG      |
|                        | intron mcph1-off 7R           | TGGGGCTGAGCTCAACTGATCAAACCT     |
|                        | intron mcph1-off 8F           | GGAGAGACTGAACAATTGTGTGAAGAGGA   |
| intron mcph1-off 8R    | TGAAGAAATGGGGAATGCTGCACGAGACA |                                 |
| intron mcph1-off 9F    | AATCTAAATGTCAGTCTTTTCGTTGT    |                                 |

|                      |                                |
|----------------------|--------------------------------|
| intron mcph1-off 9R  | TATACAAATGCATTCGTGCTGAAGCGAAC  |
| intron mcph1-off 10F | AACCTGGGCTTCTTTTCAGCTTTTCCTATT |
| intron mcph1-off 10R | AACAACCTATGAGTTGTATTTCACTCACT  |
| intron mcph1-off 11F | TTGTTGAATACAAATGCTTAAACAC      |
| intron mcph1-off 11R | CCAATCTGAATGTTTTTGTGCTTTAG     |
| intron mcph1-off 12F | ACAGGCCACACCTGCTTGTAACCTTTGG   |
| intron mcph1-off 12R | TTACACAGTTTTAACTATAGCCATCTT    |
| intron mcph1-off 13F | AGATCATCGTTAACTATAGTCATTCTA    |
| intron mcph1-off 13R | CAAAGGTAGTTCTCTAAAGAAAATGTGTA  |
| exon mcph1-off 1R    | TTCTTTCAAGAACTTCAGAAATTC       |
| exon mcph1-off 2F    | TCTTAAGAAAACCTCTGAAGGAAAC      |
| exon mcph1-off 3F    | TTCAGCACCTTGTTGATTCAGTAT       |
| exon mcph1-off 3R    | AATCTCTTGTGGATTTTGTTTGTAC      |
| exon mcph1-off 4F    | TGCTGGAAAGGAAGAAACTCAT         |
| exon mcph1-off 4R    | ACTCGTGCACTTAAAACGTATCAGTT     |
| exon mcph1-off 5F    | TTTATGATGGCTCGGCAGTACAGTC      |
| exon mcph1-off 5R    | GGCGTGTCAGTGTTCTCACAG          |
| exon mcph1-off 6F    | CTTGTCTGCAGGTGTAGCAAT          |
| exon mcph1-off 6R    | CCATCTGTCCCATGAGAAGCTGCAT      |
| exon mcph1-off 7F    | GTCTATGAAGTACACGATTCAGATG      |
| exon mcph1-off 7R    | AGCTCATTATCTTCCAGAAATAAGA      |
| exon mcph1-off 8F    | TTCAGGTATACTCATTCTTTGCTCAT     |
| exon mcph1-off 8R    | CCAGATCCACTCCTACCAGAAACC       |
| exon mcph1-off 9F    | GATAATTCACCCTAATAAGCACACAAT    |
| exon mcph1-off 9R    | TGATAAACTCTGTTGATGCATATCT      |
| exon mcph1-off 10F   | TGACAGGCAATGGAAACATTTGCTA      |
| exon mcph1-off 10R   | CAAGCACAAATGCTAGAAACGAGAG      |
| exon mcph1-off 11F   | CGATCTGGCCACCGCTCATCCCACCTTT   |
| exon mcph1-off 11R   | TGGAGTCAATCACACCCACTGTCTTGA    |
| exon mcph1-off 12F   | TGAGTGAAAGTCTACTCTGAATGATATC   |

|                    |                                 |
|--------------------|---------------------------------|
| exon mcph1-off 12R | TATGAACTAAAAGGCCCAAGCCAACAA     |
| exon mcph1-off 13F | ACAATACCTCCCACGCCATGAAGCACTT    |
| exon mcph1-off 13R | CAGATGCACAGTGTATTTTGAAAGCA      |
| exon mcph1-off 14F | TCAGGAGAGAATGACTTCATTGGCC       |
| exon mcph1-off 14R | TTTATTTGATTTTCTACCAGTGTTAA      |
| exon mcph1-off 15F | CTCTAGGTAAAATATTACCTGCGTTTTAGTA |
| exon mcph1-off 15R | CACCAAATAGTAAGTTAAAAATAAGC      |
| exon mcph1-off 16F | TTCCGCCTCCTCAGTACTTTGAAAC       |
| exon mcph1-off 16R | TATGGAACATTTCCACCACTGCAGA       |
| exon mcph1-off 17F | ATTTTGATGACTTGTTTAAAGACTTTGGCTT |
| exon mcph1-off 17R | CCATATTCCTCTTCGTTGAGTGACAGT     |
| exon mcph1-off 18F | TGGTGACTGAAGACACCTCAAGGGTT      |
| exon mcph1-off 18R | CAGCAGTGAGAGTGATTCCCCTTTCTC     |
